# Supplementary material for: Do children’s previous dental experience and fear affect their perceived oral health-related quality of life (OHRQoL)?
Source: Springer Nature journal article supplement (doi:10.1186/s12903-017-0338-9), 2017-01-16
Supplement: MOESM1 [file 12003566]

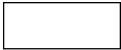

**King Abdulaziz University Faculty of Dentistry  
Department of Pediatric Dentistry**

**Parents' Questionnaire**

**Name:** \_\_\_\_\_

**Age:** \_\_\_\_\_ years

**Gender:** \_\_\_\_\_

**Grade:** \_\_\_\_\_

***Please fill the following information about your child:***

**Number of sibling(s):** \_\_\_\_\_

**Birth order of your child:** \_\_\_\_\_

***The first questions will ask you information about your child:***

**1. Does your child have any chronic health conditions or is currently taking any medications?**

- a) Yes. *Please specify* \_\_\_\_\_
- b) No
- c) I don't know

**2. Has your child ever been hospitalized?**

- a) Yes. *Please specify* \_\_\_\_\_
- b) No
- c) I don't know

**2. How often does your child visit the dentist?**

- a) Regularly, every 6 months
- b) When feeling pain only
- c) Occasionally
- d) He/she never visited a dentist
- e) I don't know

**4. In the last year, has your child visited the dentist?**

- a) Yes
- b) No
- c) I don't know

**5. In the past 3 months, has your child visited the dentist?**

- a) Yes
- b) No
- c) I don't know

**6. What were the reasons for his/her most recent dental visit? (check all that apply):**

- a) Regular checkup
- b) Dental pain
- c) Dental filling(s)
- d) Esthetic reason(s)
- e) Other(s).....

**7. What procedures did his/her previous dental treatment include? (check all that apply):**

- a) Dental examination
- b) Local anesthesia
- c) Dental extraction
- d) Tooth filling
- e) Dental prophylaxis
- f) Other(s) \_\_\_\_\_

**8. During the previous dental visit(s), did he/she feel pain?**

- a) Yes
- b) No
- c) Slightly
- d) I don't know

**9. During the previous dental visit(s), how was his/her behavior?**

- a) Crying
- b) Screaming
- c) Resistant
- d) Cooperative
- e) Happy
- f) I don't know

***These next questions will ask you for information about the child's mother and father:***

| <b>Question</b>                                          | <b>Father</b>                                                                                                                    | <b>Mother</b>                                                                                                      |
|----------------------------------------------------------|----------------------------------------------------------------------------------------------------------------------------------|--------------------------------------------------------------------------------------------------------------------|
| <b>What is your age?</b>                                 |                                                                                                                                  |                                                                                                                    |
| <b>What is your nationality?</b>                         |                                                                                                                                  |                                                                                                                    |
| <b>What is your Current marital status?</b>              | A) Married<br>B) Divorced/Separated<br>C) Widowed                                                                                | A) Married<br>B) Divorced/Separated<br>C) Widowed                                                                  |
| <b>What is the highest level of school you attended?</b> | A) Less than secondary<br>B) Secondary<br>C) University                                                                          | A) Less than secondary<br>B) Secondary<br>C) University                                                            |
| <b>What is your current occupation?</b>                  | A) Laborer<br>B) Self-employed<br>C) Employee (Government or private)<br>D) Soldier<br>E) Unemployed<br>F) Student<br>G) Retired | A) Laborer<br>B) Self-employed<br>C) Employee (Government or private)<br>D) Unemployed<br>E) Student<br>F) Retired |
| <b>What is your current monthly family income?</b>       | A) Less than 5,000 Saudi Riyals<br>B) Between 5,000 and 10,000 Saudi Riyals<br>C) More than 10,000 Saudi Riyals                  |                                                                                                                    |

**This questionnaire was filled by the child's:**

- A. Father
- B. Mother
- C. Both parents
- D. Grandparent
- E. Other (how is he/she related to the child?) \_\_\_\_\_

**Thank you for taking the time to complete this survey!**
